# Supplementary material for: SCARF1 Deficiency Exacerbates Gut Inflammation and Autoimmune Pathology
Source: Research Square preprint supplement (doi:10.21203/rs.3.rs-7023221/v1), 2025-07-24
Supplement: Supplementary file 1 [file 2e887c49dba57ccc9cbfff60.pdf]

Supplemental Figure:

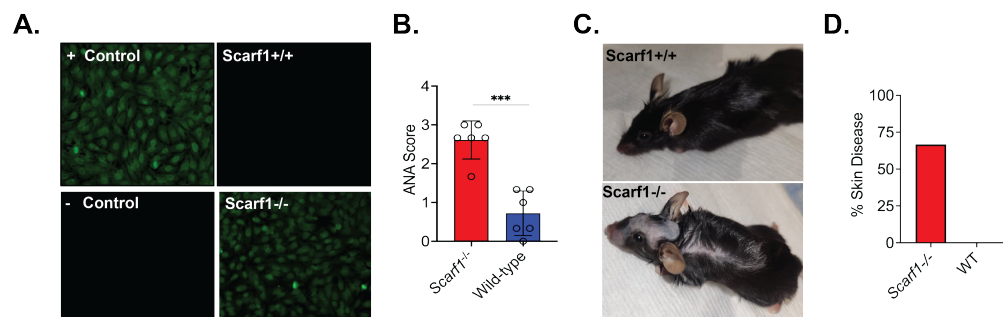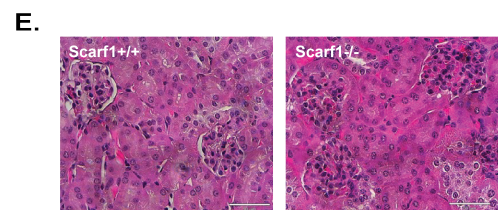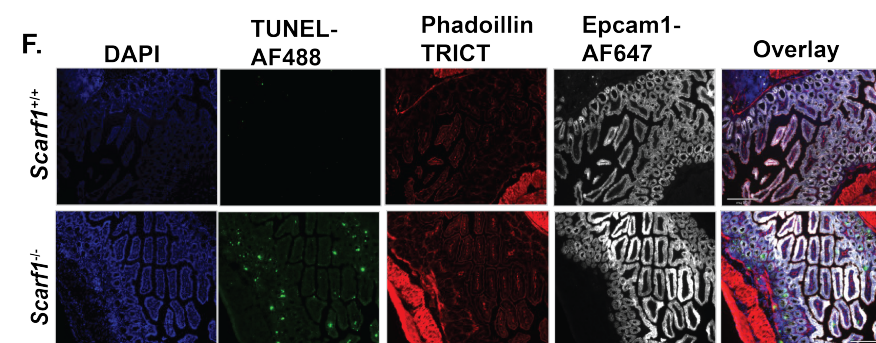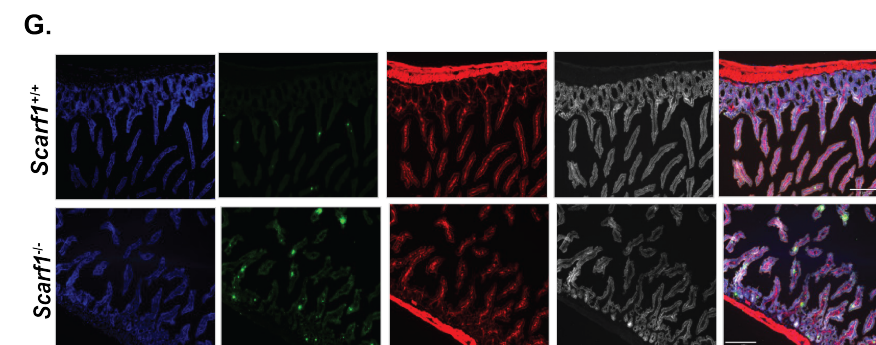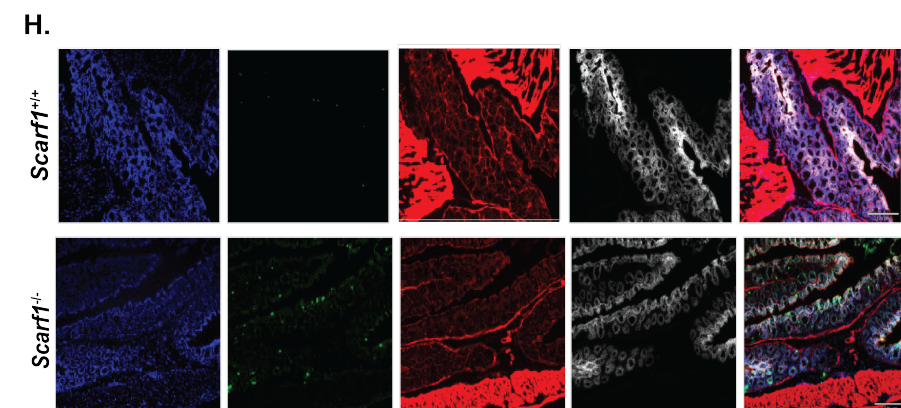

**Supplemental Figure 1. *Scarf1*<sup>-/-</sup> develop autoimmunity after 20-weeks of age.** A) ANA

immunofluorescence of HEp-2 cells, with serum from 20-week-old *Scarf1*<sup>+/+</sup> and *Scarf1*<sup>-/-</sup> mice (n = 6 female mice per group). Original magnification, ×20. B) Frequency of serum ANA. n = 6

female mice, *p* < 0.05 C) *Scarf1*<sup>-/-</sup> mice develop skin disease after 20-weeks of age.

Photography of *Scarf1*<sup>+/+</sup> and *Scarf1*<sup>-/-</sup> mice. D) Incidence and total severity of skin disease in

*Scarf1*<sup>-/-</sup> mice (n = 6 per group). E) Hematoxylin-and-eosin staining of fixed cryosections of

kidneys from 20-week-old female *Scarf1*<sup>+/+</sup> and *Scarf1*<sup>-/-</sup> mice (n = 3 per group). Original

magnification, ×20. F-H) Fluorescence microscopy of Duodenum, Ileum and Colon sections

from >20-week-old *Scarf1*<sup>+/+</sup> and *Scarf1*<sup>-/-</sup> mice, showing apoptotic cells stained by TUNEL

(green) and phalloidin (red), EPCAM-1 (white) and DAPI (blue). Representative image of 3

independent experiments. 20x magnification. F) Ileum, G) Duodenum, H) Colon

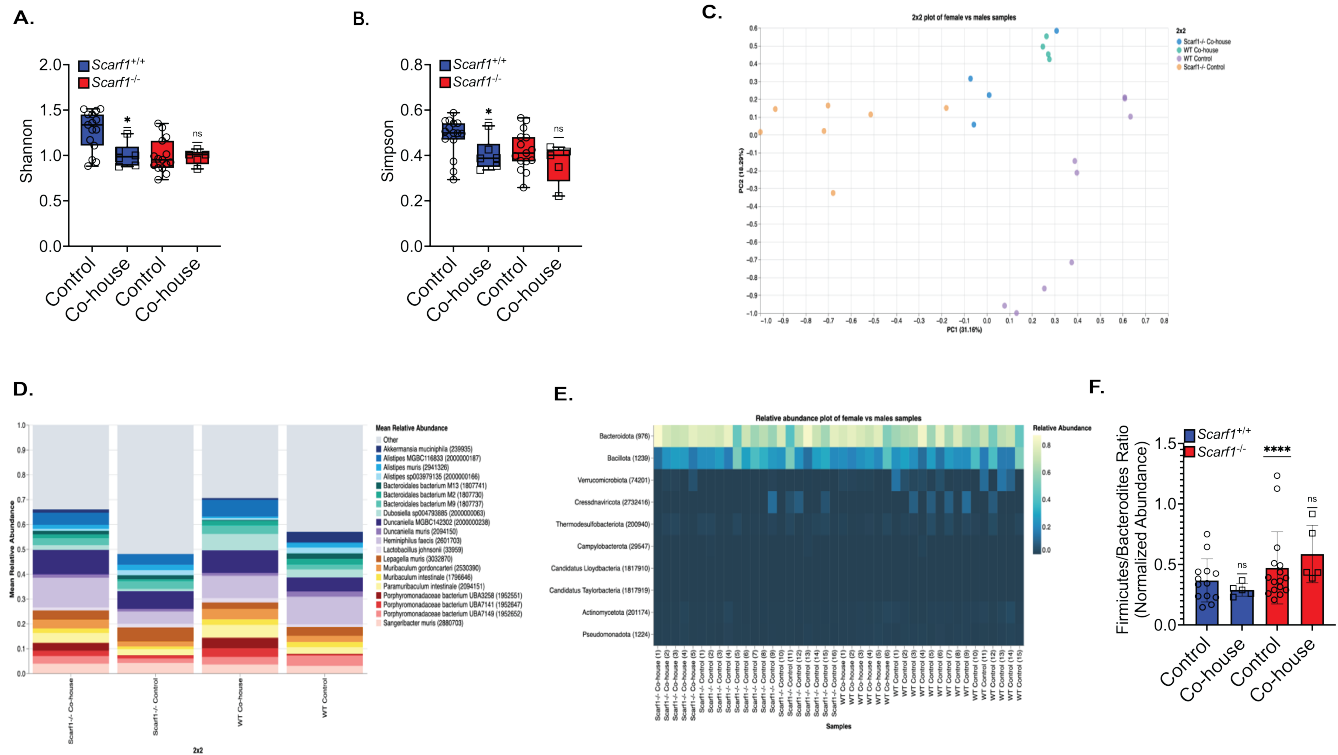

## Supplemental Figure 2: Co-housing wild-type and *Scarf1*<sup>-/-</sup> does not alter alpha diversity

or F/B ratio. Mice were co-house in a 2x2 system for 14 days. A-B) Alpha diversity of fecal microbiota in wild-type and *Scarf1*<sup>-/-</sup> mice from control or co-house conditions, measured by A) Shannon and B) Simpson diversity indices. C) Principal Coordinates Analysis (PCoA) plot of bacterial beta-diversity based on Bray–Curtis dissimilarities. Data represent two independent experiments combined. E) Heat map showing mean relative abundance of the top 10 phyla, F) F/B ratio calculated from normalized read counts.



**A.**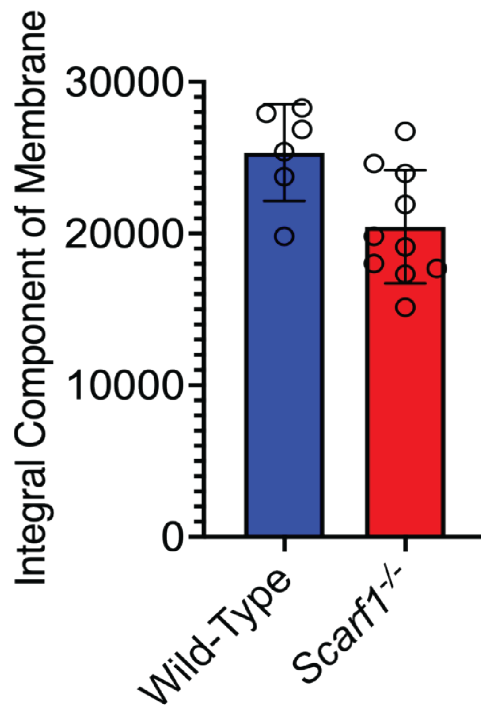**B.**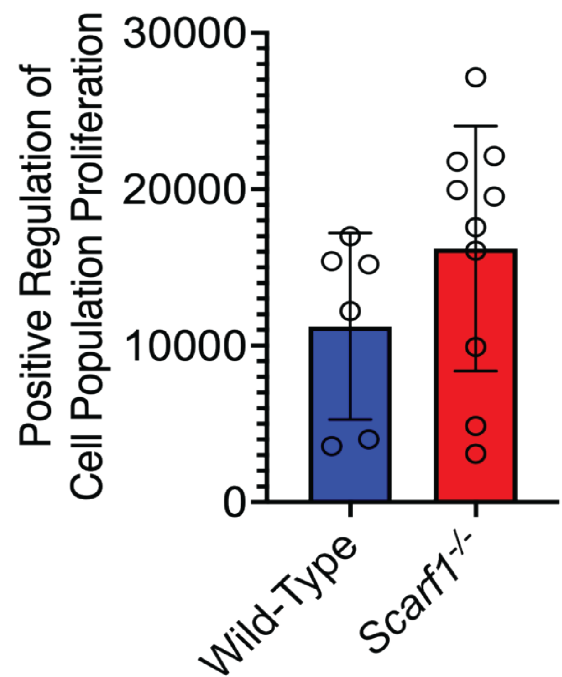

**Supplemental Figure 3. Quantification of Functional Analysis.** GO Term analysis in gut samples as copies per million comparing *Scarf1*<sup>+/+</sup> and *Scarf1*<sup>-/-</sup> mice. A) Integral component of membrane, B) Positive regulation of cell proliferation. Samples are for individual *Scarf1*<sup>+/+</sup> (n=6) and *Scarf1*<sup>-/-</sup> (n=10) mice. Samples show trends but are not statistically significant according to the non-parametric Wilcoxon rank statistical test.
